# Supplementary material for: How Thailand eliminated lymphatic filariasis as a public health problem
Source: PubMed Central journal article supplement (PMC6535972; doi:10.1186/s40249-019-0549-1), 2019-05-27

عامه صحية كمشكله ال لم فاوية ال فيلاريات داء تايلاند ألفت ك يف

، ساند تاب وويونا، خوانغ يونغ ناراب ورن، ثاماب الو سوي تش، ب و زديج باتا شاري دا، مسواك تاناب ورن، Sunsanee Rojanapanus، راداياه د. Kapa، غوب ينات ديبار، بريم بري بري تشا

مجرده

منطقة في العالم ال صحة منظمه في عشره الاحدي الأعضاء الدول من تسع في متوطن ال لم فاوي ال فيلاريات داء: الخلفية في ال لم فاوية ال فيلاريات داء علي ل قضاء ني الوط ال برنامج مع المكافحة ال تدخلات المقالة هذه توضح اسيا شرق جنوب 2017. في عليه القضاء من ال تحقق حتى 2001 في إطلاقه منذ تايلاند

المتوحشة الخبثية الخطوط فيها كانت التي المناطق ل تحديد 2001 ال في أساسيه وبيد انه اسد تقصائيه دراسة بدات: الطرق (DEC) كاربامازين اي ثيل ثنائي سترات مع (MDA) لادويه ملة الاشا الاداره تنفيذ تم. حدوده ورسمت والقاعدية (LF) ال لم فاوية ال فيلاريات داء الاموبوءة المقاطعات من 11 في (IUs) تنفيذ وحده 357 مجموعها ما في (ALB) والا بدينازول 11 المتوطنة لمقاطعات في 2006 في MDA لوقف الاسد تقصائيه الدراسات وأجريت فرعيه قرية (IU) الامنفة الوحدة وكانت مسد تضد عن ل لكشف (ICT) الا سد شراب اخ تبار باسد تخدام سنوات 6 ≤ والأط فال العمر من سنوات 6 من أثار السكان ب LF باسد تخدام 2011 في MDA لوقف مسوحات اجراء تم، نارات يوات مقاطعه في. الملايو و بروجيا (mf) الصغيرة وال ميكروبات 6 العمرية ال فئة في المدارس طلاب ب بين 2016-2017 و 2015 و 2012-2013 في (TAS) الإرسال متقريب مسوح أجريت. ELISA 2002- عام خلال مقاطعات سبع في للمهاجرين الوطني الصحي الفحص خلال من المهاجرين السكان مراقبه وكثفت. سنة 2012-2017 المناطق من مقاطعات أربع وفي. والاتصالات المعلومات كنولوجيا اراختب بطاقات باسد تخدام بالدم ال تسمم لمكافحة 2017 دراسة إنشأت وقد 1994 في المدلية القطط في LF خزان عن ل لكشف السنوية الاسد تقصائيه الدراسات بدات، بها الاموبوءة داء/ال لم فاوية ال وضمه من انون يع الذين ل الأشخاص ال تراكمي ل لعدد سجلا LF ل بال نسبة المزممة الامراض لعب 2001 اسد تقصائيه ال فنطيات

جولات إلى حاجه هناك وكانت IUs جمع في 2002-2006 مدي علي سنويا MDA من جولات خمس مجموعها ما تنفيذ تم: ال نتائج تالمخدرات تغطيه وكانت. الامس تمرة العدوى بسبب 2007-2011 من نارات يوات مقاطعه من 87 IUs في MDA من اضافيه سنوية 11 المقاطعات في 2006 في MDA وقف الامسوحات. 95.4% إلى 68.0% نطاق في 2002-2012 علي MDA مع السنوية الوطنية (المدى): 0.1: 0.8% ان تشار معدل علي مع نارات يوات مقاطعه في IUs سبعة في mf الاي جابيه الحالات تسعه وجدت المتوطنة LF المضادة الأجسام بين وسط الملايو و b. الإرسال عتبه معدلات أذناه ك شفت 3-TAS و 2-تاس، 1-تاس ال نارات في (% 0.8 u عن تسفر ل المثلثة TAS جمع في mf ال حالات كل تبع الاتصال. (ال توالي علي % 0.7 و % 0.2، % 0.3) الاي جابيه الأط فال. ايجابيه حالات

الناطق المائة في 0.7 ايجابيه بالمعدلاي بين ما هو، شخصا 23 477 مجموعها ما اراختب تم، للمهاجرين الوطني الصحي الفحص خلال ومن 2003 في القطط بين اي فرمكتين السنوي العلاج بدات، نارات يوات بين محافظه في 2002-2017 سنوات مدي علي (% 0.1-2.7، 2017 ابريل/نيسان من واعدت بارا 2015. في % 0.8 إلى 1995 في % 8.0 من القطط بين وسط ان تشار في اندخاض إلى ادي ما. صحي مرفق 34 اطار في ومتابعتهم ال فنطيات/ال لم فاوية ال وضمه مرضي من 99 مجموعها ما تسجل تم

عمليات خلال ومن. ال تغطية معدلات ارتفاع مع MDA واسعه أجريت 2011 إلى 2002 ال سنتين مر علي تايلاند: اسد نتائج ال تقديم مسوحات خلال من وأظهرت الفرعية القرية مسد توي علي LF إرسال مناطق ب تحديد قامت، لمدن تظمتوا الدورية الرصد وفي القضاء LF صحة من ال تحقق من مكنت التي الإرسال عتبه معدلات دون، TAS و MDA- ستوب مسوحات بها الخاصة كمشكله ال لم فاوية ال فيلاريات داء أزلت تايلاند في الصحة وزاره بان العالمية ال صحة منظمه اعترفت، 2017 سد بتمبر/أيلول عامه صحية

Translated from English version into Arabic by Hamza Shaffison, through

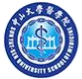

中山大學醫學院  
SUN YAT-SEN UNIVERSITY SCHOOL OF MEDICINE

## 泰国是如何消除淋巴丝虫病这一公共卫生问题的？

Sunsanee Rojanapanus, Tanaporn Toothong, Patcharida Boondej, Suwich Thammapalo, Naraporn Khuanyoung, Weena Santabutr, Preecha Prempre, Deyer Gopinath and Kapa D. Ramaiah

### 摘要

**引言：**在世界卫生组织东南亚区域的 11 个成员国中，有 9 个国家有淋巴丝虫病。本文介绍了自 2001 年泰国启动消除淋巴丝虫病国家计划至 2017 年消除认证期间所采取的强化干预措施。

**方法：**2001年泰国启动了一项基线流行病学调查，以确定布鲁丝虫病和班氏丝虫病流行区及其流行情况。在11个淋巴丝虫病（LF）流行省份的357个实施单位（IU）使用乙胺嗪（DEC）和阿苯达唑（ALB）进行群体化疗（MDA）。以亚村（sub-village）为实施单位。2006年在11个LF流行省份进行Stop-MDA调查，对6岁以上人群和≤6岁儿童使用免疫层析测试（ICT）来检测班氏丝虫（*Wuchereria bancrofti*）抗原，通过检测微丝蚴（mf）来确定马来丝虫感染。2011年在那拉提瓦省使用ELISA进行Stop-MDA调查。2012–2013年、2015年和2016–2017年在6–7岁年龄组进行传播评估调查（TAS）。在2002–2017年间，通过全国流动人口健康检查使用ICT测试卡对7个省的流动人口进行加强监测。在4个马来丝虫流行省，自1994年开始开展年度调查，检测家猫的LF情况。2001年开展LF慢性病负担调查，将淋巴水肿/象皮病人登记造册。

**结果：**2002–2006年，所有IU共实施了5轮MDA。由于持续感染，2007–2011年Narathiwat省的87个IU需要进行额外的年度MDA。2002–2012年期间MDA年度全国药物覆盖率为68.0–95.4%。2006年在11个LF流行省份进行的Stop-MDA调查结果显示，Narathiwat省7个IU中检测到9个阳性病例，患病率最高为0.8%（范围：0.1–0.8%）。在Narathiwat省的TAS-1、TAS-2和TAS-3期间，在抗体阳性儿童中检测到低于马来丝虫mf的传播阈值率，分别为0.3%、0.2%和0.7%。对所有3个TAS评估调查发现的所有mf病例进行接触者追踪，均未发现阳性病例。

针对流动人口的健康检查，共检测了23 477人，2002–2017年间的阳性率为0.7%（范围：0.1–2.7%）。在那拉提瓦省，于2003年开始对猫进行每年伊维菌素治疗，从而使猫的mf患病率从1995年的8.0%降至2015年的0.8%。截至2017年4月，共登记了99名淋巴水肿/象皮病患者，并在34个卫生机构进行随访。

**结论：**2002–2011年间泰国进行了高强度高覆盖率的MDA。通过定期和常规监测调查，在亚村级别确定了流行区，并通过Stop-MDA调查和TAS评估调查，证明其已低于达到消除认证的传播阈值。2017年9月，世界卫生组织确认泰国已实现了将淋巴丝虫病作为一个公共卫生问题予以消除。

Translated from English version into Chinese by Xin-Yu Feng, edited by Pin Yang

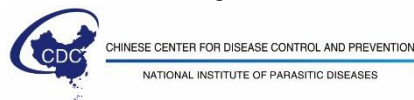

## Comment la Thaïlande a éliminé le problème de santé publique de la filariose lymphatique

Sunsanee Rojanapanus, Tanaporn Toothong, Patcharida Boondej, Suwich Thammapalo, Naraporn Khuanyoung, Weena Santabutr, Preecha Prempre, Deyer Gopinath et Kapa D. Ramaiah

### Résumé

**Contexte：**La filariose lymphatique est endémique dans neuf des onze pays qui composent la Région Asie du Sud-Est de l'OMS. Le présent article décrit les interventions intensives du Programme national pour l'élimination de la filariose lymphatique en Thaïlande, de son lancement en 2001 à la confirmation de l'élimination en 2017.

**Méthodes：**Une enquête épidémiologique de référence a été lancée en 2001 pour identifier les zones de filariose brugienne et bancroftienne et tracer les contours des zones d'endémie. Du citrate de diéthylcarbamazine (DEC) et de l'albendazole

(ALB) ont été distribués dans le cadre d'une administration de médicaments en masse (AMM) dans 357 unités de déploiement (UD) au total, dans 11 provinces où la filariose lymphatique était endémique. L'unité de déploiement correspond à un quartier de village. Des enquêtes d'arrêt de l'AMM ont été menées en 2006 dans les 11 provinces d'endémie, sur la population âgée de plus de 6 ans et les enfants de moins de 6, à l'aide d'un test immunochromatographique (TIC) pour rechercher l'antigène de *Wuchereria bancrofti* et de la détection des microfilaires pour détecter *Brugia malayi*. Dans la province de Narathiwat, les enquêtes d'arrêt de l'AMM ont été réalisées en 2011 au moyen d'un test ELISA. Des enquêtes d'évaluation de la transmission ont été menées en 2012-2013, 2015 et 2016-2017 parmi les écoliers de 6-7 ans. La surveillance des populations migrantes au moyen du contrôle sanitaire national des migrants a été intensifiée dans 7 provinces entre 2002 et 2017 et la recherche de l'antigénémie FL au moyen de cartes de test immunochromatographique y a été ajoutée. Dans quatre provinces où *B. malayi* était endémique, des enquêtes annuelles visant à détecter les réservoirs de filariose parmi les chats domestiques ont débuté en 1994. Une étude sur le fardeau de la maladie chronique réalisée pour la filariose lymphatique en 2001 a enregistré le nombre cumulé de personnes présentant un lymphœdème / un éléphantiasis.

**Résultats:** Au total, cinq cures d'AMM ont été administrées chaque année entre 2002 et 2006 dans toutes les unités de déploiement. Des cures supplémentaires ont été nécessaires dans 87 unités de déploiement de la province de Narathiwat entre 2007 et 2011, en raison de la persistance de l'infestation. La couverture nationale par l'AMM entre 2002 et 2012 était comprise entre 68,0 % et 95,4 %. Les études d'arrêt de l'AMM de 2006 dans les 11 provinces de FL endémique ont recensé 9 cas positifs pour les microfilaires dans sept unités de déploiement de la province de Narathiwat où la prévalence était maximale à 0,8 % (extrêmes: 0,1-0,8 %). Dans la province de Narathiwat, les études de transmission TAS-1, TAS-2 et TAS-3 ont mesuré des taux de transmission inférieurs au seuil pour les microfilaires de *B. malayi* parmi les enfants ayant des anticorps positifs (0,3 %, 0,2 % et 0,7 % respectivement). Un suivi des contacts de tous les cas positifs aux microfilaires lors des trois études de transmission n'a remonté aucun cas positif.

Le contrôle sanitaire des migrants a permis de tester au total 23 477 personnes, dont 0,7 % étaient positives (fourchette: 0,1-2,7 %), entre 2002 et 2017. Dans la province de Narathiwat, un traitement annuel à l'ivermectine des chats a été mis en place en 2003 et a permis une baisse de la prévalence des microfilaires chez les chats de 8,0 % en 1995 à 0,8 % en 2015. En avril 2017, un total de 99 patients présentant un lymphœdème / un éléphantiasis étaient enregistrés et suivis dans 34 centres sanitaires.

**Conclusion:** Entre 2002 et 2011, la Thaïlande a procédé à des AMM extensives, avec un fort taux de couverture. Grâce à des enquêtes de suivi périodiques et régulières, les autorités sanitaires ont tracé les zones de transmission de la filariose lymphatique au niveau des quartiers des villages et démontré, par les enquêtes d'évaluation (études d'arrêt de l'AMM et études de transmission), que les taux de transmission étaient inférieurs au seuil, ce qui a permis de confirmer l'élimination de la filariose lymphatique. En septembre 2017, l'Organisation mondiale de la Santé a reconnu que le Ministère de la Santé thaïlandais avait éliminé le problème de santé publique de la filariose lymphatique.

Translated from English version into French by Suzanne Assenat, proofread by Gwenaëlle Le Jan-Moulart, through

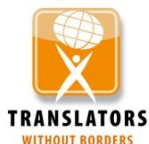

### Как Тайланд победил лимфатический филяриатоз как проблему общественного здравоохранения

Сунсани Роджанананус (Sunsanee Rojanananus), Танапорн Тутонг (Tanaporn Toothong), Патчарида Бундей (Patcharida Boondej), Сувич Таммапало (Suwich Thammapalo), Нараторн Хуанйонг (Naraporn Khuanyoung), Вина

Сантабутр (Weena Santabutr), Прича Премпри (Preecha Prempree), Дейер Гопинат (Deyer Gopinath) и Капа Д. Рамайя (Kara D. Ramaiah)

## Реферат

**Справочная информация:** лимфатический филяриоз эндемичен в 9 из 11 стран-членов ВОЗ Юго-Восточной Азии. В этой статье описывается интенсивное вмешательство в Национальную программу по ликвидации лимфатического филяриоза в Таиланде с момента его появления в 2001 году до подтверждения о его ликвидации в 2017 году.

**Методы:** В 2001 году началось базовое эпидемиологическое обследование для выявления как филяриоза Бэнкрофта, так и бругиоза, а также для определения их эндемичности. Широкомасштабное лечение (ШМЛ) цитратом диэтилкарбамазина (DEC) и альбендазолом (ALB) было осуществлено в общей сложности в 357 пунктах реализации (ПР) в 11 провинциях, в которых эндемичен лимфатический филяриоз (ЛФ). Такими пунктами реализации (ПР) являлись деревни. Обследования в рамках широкомасштабного лечения были проведены в 2006 году в 11 провинциях, для которых эндемичен лимфатический филяриоз, среди населения старше 6 лет и детей до 6 лет с использованием иммунохроматографического исследования (ИХТ) для обнаружения антигена *Wuchereria bancrofti* и выявления микрофилярий (мф) для *Brugia malayi*. В провинции Наратхиват в 2011 году в рамках широкомасштабного лечения проводились исследования с использованием ELISA (ИФА, иммуноферментный твердофазный анализ). Оценочные исследования передачи (ОИП) проводились в 2012–2013, 2015 и 2016–2017 годах среди школьников в возрасте 6–7 лет. В период с 2002 по 2017 г. в семи провинциях проводился более интенсивный эпиднадзор за мигрирующим населением с помощью национального медицинского обследования здоровья мигрантов с использованием тест-карт ИХТ. В четырех провинциях с эндемичным *B. malayi* ежегодные обследования для выявления лимфатического филяриоза у домашних кошек начались в 1994 году. Обследование бремени хронических заболеваний, проведенное в 2001 году, позволило установить регистр совокупного числа людей с лимфатическим филяриозом.

**Результаты:** В течение 2002–2006 годов были проведены пять раундов ШМЛ в год. Дополнительные ежегодные раунды ШМЛ потребовались в 87 ПР провинции Наратхиват с 2007 по 2011 год из-за постоянной инфекции. Годовой национальный охват лекарственными препаратами для ШМЛ за 2002–2012 годы находился в диапазоне от 68,0 % до 95,4 %. Обследования стоп-ШМЛ в 2006 году в 11 провинциях, для которых эндемичен ЛФ, выявили девять случаев положительного анализа на mf в семи ПР в провинции Наратхиват с самой высокой распространенностью 0,8 % (диапазон: 0,1–0,8 %). В процессе ОИП-1, ОИП-2 и ОИП-3 в Наратхиват выявляли уровни ниже уровня передачи для mf *B. malayi* среди антителопозитивных детей (0,3 %, 0,2 % и 0,7 %, соответственно). Отслеживание контактов во всех трех случаях mf во всех трех ОИП не дало положительных результатов.

В ходе проверки здоровья мигрантов было осмотрено в общей сложности 23 477 человек. В результате показатель оказался положительным — 0,7 % (диапазон: 0,1–2,7 %) за 2002–2017 годы. В провинции Наратхиват ежегодное лечение ивермектином среди кошек началось в 2003 году, что привело к снижению распространенности mf у кошек с 8,0 % в 1995 году до 0,8 % в 2015 году. По состоянию на апрель 2017 года в 34 медицинских учреждениях было зарегистрировано 99 пациентов с лимфатическим отеком/элефантиазом, которые находились под наблюдением.

**Выводы:** Таиланд в период с 2002 по 2011 годы проводил масштабное лечение с большим охватом. Посредством периодических и регулярных мониторинговых обследований очерчивались зоны передачи ЛФ на уровне поселений и демонстрировались в своих оценочных исследованиях — исследованиях стоп-ШМЛ и ОИП — ниже пороговых значений передачи, что позволило провести валидацию устранения ЛФ. В сентябре 2017 года

Всемирная организация здравоохранения признала, что Министерство здравоохранения Таиланда ликвидировало лимфатический филяриатоз как проблему общественного здравоохранения.

Translated from English version into Russian by Michael Kovalevich, proofread by Michael Orlov, through

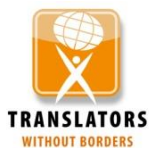

## Cómo Tailandia eliminó la filariasis linfática como problema de salud pública

Sunsanee Rojanapanus, Tanaporn Toothong, Patcharida Boondej, Suwich Thammapalo, Naraporn Khuanyoung, Weena Santabutr, Preecha Prempre, Deyer Gopinath y Kapa D. Ramaiah

### Resumen

**Antecedentes:** la filariasis linfática es endémica en nueve de los once Estados Miembros de la Organización Mundial de la Salud en la región del sudeste asiático. El presente artículo describe las intervenciones intensivas del Programa Nacional de Eliminación de la filariasis linfática en Tailandia desde su lanzamiento en 2001 hasta la confirmación de su eliminación en 2017.

**Métodos:** En 2001 comenzó un estudio de investigación epidemiológico de base para identificar las zonas de filariasis brugiana y bancroftiana y definir su endemicidad. Se implementó la administración masiva de medicamentos (MDA, por sus siglas en inglés) con citrato de dietilcarbamazina (DEC) y albendazol (ALB) en un total de 357 unidades de implementación (UI) en once provincias en las que la filariasis linfática (FL) es endémica. La unidad de implementación (UI) fue una subaldea. En 2006 se realizaron estudios entre la población mayor de 6 años y niños de  $\leq 6$  años sobre la suspensión de la MDA en las once provincias en las que la FL es endémica utilizando una prueba inmunocromatográfica (ICT) para la detección del antígeno de *Wuchereria bancrofti* y de microfilarias (mf) para *Brugia malayi*. En la provincia de Narathiwat, los estudios sobre la suspensión de la MDA se realizaron en 2011 utilizando ELISA. En 2012–2013, 2015 y 2016–2017 se llevaron a cabo estudios de evaluación de la transmisión (TAS, por sus siglas en inglés) entre alumnos del grupo de edad de 6 a 7 años. Se intensificó la vigilancia de las poblaciones migrantes a través del chequeo médico nacional de los migrantes en siete provincias entre 2002 y 2017 para la antigenemia de FL utilizando tarjetas de ICT. En 1994 se iniciaron estudios anuales para detectar depósitos de FL en gatos domésticos en cuatro provincias en las que el *B. malayi* es endémico. Un estudio de 2001 sobre la carga de una enfermedad crónica para FL estableció un registro del número acumulativo de personas con linfedema / elefantiasis.

**Resultados:** se realizó un total de cinco rondas de MDA anualmente entre 2002 y 2006 en todas las UI. Se necesitaron rondas anuales adicionales de MDA en 87 UI de la provincia de Narathiwat entre 2007 y 2011 debido a la infección persistente. La cobertura nacional anual de medicamentos con MDA entre 2002 y 2012 fue de entre el 68,0 % y el 95,4 %. Los estudios sobre la suspensión de la MDA en 2006 en las once provincias en las que la FL es endémica encontraron nueve casos positivos de mf en siete UI en la provincia de Narathiwat con la mayor prevalencia siendo del 0,8 % (rango: 0,1–0,8 %). En Narathiwat los TAS-1, TAS-2 y TAS-3 detectaron una transmisión por debajo de los tipos de umbral para mf *B. malayi* entre los niños con anticuerpos positivos (0,3 %, 0,2 % y 0,7 %, respectivamente). La trazabilidad de contactos de todos los casos de mf en los tres TAS no dio ningún caso positivo.

A través del chequeo médico de los migrantes, se examinó un total de 23 477 personas, que mostraron un tipo positivo del 0,7 % (rango: 0,1–2,7 %) entre los años 2002 y 2017. En la provincia de Narathiwat, el tratamiento anual con ivermectina entre los gatos comenzó en 2003, lo que generó una disminución de la prevalencia de mf entre los gatos del 8,0 % en 1995

al 0,8 % en 2015. A partir de abril de 2017, se registró un total de 99 pacientes con linfedema / elephantiasis y se les dio un seguimiento en 34 centros de salud.

**Conclusiones:** entre los años 2002 y 2011, Tailandia llevó a cabo una amplia MDA con altas tasas de cobertura. Mediante los estudios de seguimiento periódicos y regulares, delimitó las zonas de transmisión de FL a nivel de subaldeas y, a través de sus estudios de evaluación, los estudios sobre la suspensión de la MDA y los TAS, demostró una transmisión por debajo de los tipos de umbral, lo que permitió la confirmación de la eliminación de FL. En septiembre de 2017, la Organización Mundial de la Salud reconoció que el Ministerio de Salud de Tailandia había eliminado la filariasis linfática como problema de salud pública.

Translated from English version into Spanish by Mayra León, proofread by Sandra González, through



Supplement: 40249_2019_549_MOESM1_ESM.pdf [file 40249_2019_549_MOESM1_ESM.pdf]
